# Supplementary material
Source: Springer Nature journal article supplement (https://www.springermedizin.de/resource/supplementary/12891_2014_2312_MOESM3_ESM.pdf/9509956)
Supplement: MOESM3 [file 9509956]

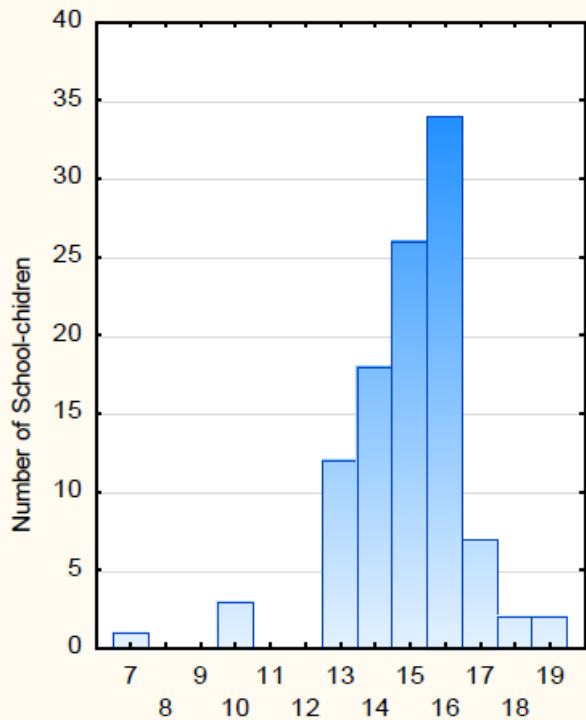

Gender: Male

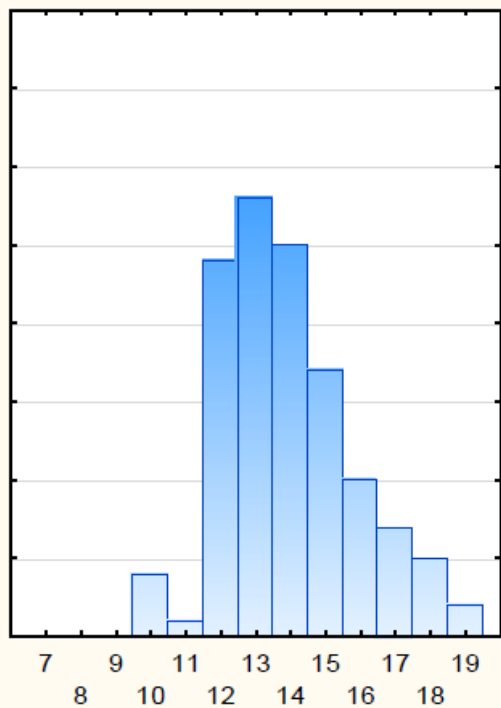

Gender: Female

Age of onset of low back pain
